# Supplementary material for: Effect of induced hypoglycemia on inflammation and oxidative stress in type 2 diabetes and control subjects
Source: PubMed Central journal article supplement (PMC7075968; doi:10.1038/s41598-020-61531-z), 2020-03-16
Supplement: 41598_2020_61531_MOESM1_ESM.pdf [file 41598_2020_61531_MOESM1_ESM.pdf]

**Effect of induced hypoglycemia on inflammation and oxidative stress in type 2 diabetes and control subjects**

Hassan Kahal PhD<sup>1,2\*</sup>, Anna Halama, PhD<sup>3\*</sup>, Ahmed Aburima PhD<sup>2</sup>, Aditya M. Bhagwat PhD<sup>3</sup>, Alexandra E. Butler MD<sup>4#</sup>, Johannes Graumann, PhD<sup>5,6</sup>, Karsten Suhre, PhD<sup>5</sup>, Thozhukat Sathyapalan MD<sup>1</sup>, Stephen L Atkin MD<sup>7</sup>

1. Academic Endocrinology, Diabetes and Metabolism, Hull York Medical School, Hull, UK.
2. Centre for Cardiovascular and Metabolic Research, Hull York Medical School, Hull, UK.
3. Weill Cornell Medicine Qatar, Education City, PO 24144 Doha, Qatar.
4. Diabetes Research Center (DRC), Qatar Biomedical Research Institute (QBRI), Hamad Bin Khalifa University (HBKU), Qatar Foundation (QF), PO Box 34110, Doha, Qatar
5. Proteomics Core, Weill Cornell Medicine-Qatar, Education City, PO Box 24144, Doha, Qatar
6. Scientific Service Group Biomolecular Mass Spectrometry, Max Planck Institute for Heart and Lung Research, Ludwigstr. 43, 61231 Bad Nauheim Germany
7. Royal College of Surgeon in Ireland, Bahrain.

\* These authors contributed equally to this work.

Supplementary Table 1. Inflammatory protein panel for all proteins for the type 2 diabetes patients, p value and fdr values (<0.05 for fdr was considered significant)

| Target Full Name                                              | P      | fd     |
|---------------------------------------------------------------|--------|--------|
| C-X-C motif chemokine 10                                      | 0.0003 | 0.0196 |
| Interleukin-5                                                 | 0.0003 | 0.0196 |
| Azurocidin                                                    | 0.0006 | 0.0268 |
| C-type lectin domain family 7 member A                        | 0.0008 | 0.0268 |
| Serine/threonine-protein kinase TBK1                          | 0.0012 | 0.0308 |
| Protein kinase C zeta type                                    | 0.0017 | 0.0308 |
| Ribosomal protein S6 kinase alpha-5                           | 0.0017 | 0.0308 |
| CD40 ligand                                                   | 0.0017 | 0.0308 |
| Interleukin-34                                                | 0.0020 | 0.0311 |
| High mobility group protein B1                                | 0.0022 | 0.0311 |
| Protein S100-A9                                               | 0.0028 | 0.0361 |
| Interleukin-1 beta                                            | 0.0041 | 0.0430 |
| C-C motif chemokine 19                                        | 0.0042 | 0.0430 |
| Sialoadhesin                                                  | 0.0043 | 0.0430 |
| Interleukin-10 receptor subunit beta                          | 0.0047 | 0.0439 |
| Fractalkine                                                   | 0.0084 | 0.0745 |
| Complement C3b, inactivated                                   | 0.0091 | 0.0754 |
| C-X-C motif chemokine 5                                       | 0.0109 | 0.0851 |
| Protein DJ-1                                                  | 0.0115 | 0.0851 |
| Tumor necrosis factor receptor superfamily member 11A         | 0.0147 | 0.1034 |
| C-C motif chemokine 7                                         | 0.0175 | 0.1174 |
| Interferon alpha-2                                            | 0.0249 | 0.1589 |
| Tumor necrosis factor receptor superfamily member 19L         | 0.0259 | 0.1589 |
| Lymphotactin                                                  | 0.0297 | 0.1744 |
| C-C motif chemokine 20                                        | 0.0333 | 0.1802 |
| Tumor necrosis factor receptor superfamily member 21          | 0.0346 | 0.1802 |
| Tumor necrosis factor receptor superfamily member 11B         | 0.0352 | 0.1802 |
| Toll-like receptor 4:Lymphocyte antigen 96 complex            | 0.0366 | 0.1802 |
| Interleukin-37                                                | 0.0371 | 0.1802 |
| C-C motif chemokine 1                                         | 0.0383 | 0.1802 |
| Interleukin-17B                                               | 0.0411 | 0.1869 |
| C-C motif chemokine 15                                        | 0.0494 | 0.2178 |
| C-C motif chemokine 4-like                                    | 0.0516 | 0.2206 |
| Interleukin-23 receptor                                       | 0.0532 | 0.2206 |
| Transforming growth factor beta-1                             | 0.0623 | 0.2448 |
| Growth-regulated alpha protein                                | 0.0662 | 0.2448 |
| Advanced glycosylation end product-specific receptor, soluble | 0.0663 | 0.2448 |

|                                                                                                                                               |        |        |
|-----------------------------------------------------------------------------------------------------------------------------------------------|--------|--------|
| Prostaglandin G/H synthase 2                                                                                                                  | 0.0673 | 0.2448 |
| Toll-like receptor 2                                                                                                                          | 0.0677 | 0.2448 |
| Oxidized low-density lipoprotein receptor 1                                                                                                   | 0.0718 | 0.2530 |
| Insulin-like growth factor-binding protein 4                                                                                                  | 0.0797 | 0.2741 |
| C-C motif chemokine 3-like 1                                                                                                                  | 0.0908 | 0.3050 |
| Phosphatidylinositol 4,5-bisphosphate 3-kinase catalytic subunit alpha isoform:Phosphatidylinositol 3-kinase regulatory subunit alpha complex | 0.0946 | 0.3103 |
| Tumor necrosis factor receptor superfamily member 1B                                                                                          | 0.0969 | 0.3106 |
| Interleukin-17D                                                                                                                               | 0.1235 | 0.3793 |
| Lymphocyte antigen 86                                                                                                                         | 0.1264 | 0.3793 |
| EGF-like module-containing mucin-like hormone receptor-like 2                                                                                 | 0.1264 | 0.3793 |
| Interleukin-6                                                                                                                                 | 0.1468 | 0.4313 |
| Eotaxin                                                                                                                                       | 0.1678 | 0.4758 |
| Endothelial monocyte-activating polypeptide 2                                                                                                 | 0.1687 | 0.4758 |
| Interleukin-2 receptor subunit alpha                                                                                                          | 0.1725 | 0.4770 |
| Interleukin-23                                                                                                                                | 0.1831 | 0.4964 |
| Tumor necrosis factor receptor superfamily member 1A                                                                                          | 0.1970 | 0.5160 |
| C-C motif chemokine 24                                                                                                                        | 0.1976 | 0.5160 |
| C-C motif chemokine 3                                                                                                                         | 0.2030 | 0.5204 |
| Tumor necrosis factor receptor superfamily member 9                                                                                           | 0.2126 | 0.5354 |
| Tumor necrosis factor receptor superfamily member 8                                                                                           | 0.2183 | 0.5400 |
| Interleukin-1 receptor-like 2                                                                                                                 | 0.2284 | 0.5554 |
| Hepatitis A virus cellular receptor 2                                                                                                         | 0.2374 | 0.5628 |
| Interleukin-22                                                                                                                                | 0.2431 | 0.5628 |
| Lysozyme C                                                                                                                                    | 0.2479 | 0.5628 |
| CD5 antigen-like                                                                                                                              | 0.2504 | 0.5628 |
| C-reactive protein                                                                                                                            | 0.2515 | 0.5628 |
| C-C motif chemokine 14                                                                                                                        | 0.2578 | 0.5680 |
| C3a anaphylatoxin des Arginine                                                                                                                | 0.2656 | 0.5687 |
| Ras-related C3 botulinum toxin substrate 1                                                                                                    | 0.2684 | 0.5687 |
| C5a anaphylatoxin                                                                                                                             | 0.2702 | 0.5687 |
| P-Selectin                                                                                                                                    | 0.2751 | 0.5704 |
| Interleukin-10                                                                                                                                | 0.2812 | 0.5747 |
| C-C motif chemokine 13                                                                                                                        | 0.2913 | 0.5789 |
| Ck-beta-8-1                                                                                                                                   | 0.2927 | 0.5789 |
| Complement C3                                                                                                                                 | 0.2956 | 0.5789 |
| C-C motif chemokine 18                                                                                                                        | 0.3089 | 0.5921 |
| Thrombospondin-1                                                                                                                              | 0.3167 | 0.5921 |
| Interleukin-17F                                                                                                                               | 0.3234 | 0.5921 |
| Tumor necrosis factor receptor superfamily member 18                                                                                          | 0.3245 | 0.5921 |
| Interleukin-8                                                                                                                                 | 0.3252 | 0.5921 |
| C3a anaphylatoxin                                                                                                                             | 0.3276 | 0.5921 |
| Complement C3b                                                                                                                                | 0.3357 | 0.5921 |

|                                                                                |        |        |
|--------------------------------------------------------------------------------|--------|--------|
| C-C motif chemokine 2                                                          | 0.3359 | 0.5921 |
| Kininogen-1                                                                    | 0.3491 | 0.6077 |
| Tyrosine-protein kinase HCK                                                    | 0.3582 | 0.6160 |
| Complement C3d fragment                                                        | 0.3739 | 0.6313 |
| C-X-C motif chemokine 6                                                        | 0.3761 | 0.6313 |
| Protein kinase C theta type                                                    | 0.3962 | 0.6511 |
| C-C motif chemokine 21                                                         | 0.4014 | 0.6511 |
| C-C motif chemokine 25                                                         | 0.4054 | 0.6511 |
| MAP kinase-activated protein kinase 2                                          | 0.4118 | 0.6511 |
| Interleukin-27                                                                 | 0.4153 | 0.6511 |
| C-C motif chemokine 17                                                         | 0.4192 | 0.6511 |
| C-X-C motif chemokine 13                                                       | 0.4202 | 0.6511 |
| C-C motif chemokine 22                                                         | 0.4628 | 0.7030 |
| Interleukin-13                                                                 | 0.4637 | 0.7030 |
| PSA:alpha-1-antichymotrypsin complex                                           | 0.4750 | 0.7121 |
| Tumor necrosis factor                                                          | 0.4828 | 0.7121 |
| C-X-C motif chemokine 11                                                       | 0.4850 | 0.7121 |
| Bone morphogenetic protein 6                                                   | 0.4936 | 0.7121 |
| Neutrophil-activating peptide 2                                                | 0.4961 | 0.7121 |
| C-C motif chemokine 8                                                          | 0.5000 | 0.7121 |
| Tumor necrosis factor receptor superfamily member 4                            | 0.5145 | 0.7228 |
| Retinoic acid receptor responder protein 2                                     | 0.5177 | 0.7228 |
| Peroxiredoxin-5, mitochondrial                                                 | 0.5280 | 0.7270 |
| Interleukin-17A                                                                | 0.5351 | 0.7270 |
| Tumor necrosis factor receptor superfamily member 10A                          | 0.5375 | 0.7270 |
| Macrophage colony-stimulating factor 1                                         | 0.5414 | 0.7270 |
| Tumor necrosis factor receptor superfamily member 14                           | 0.5558 | 0.7364 |
| Alpha-1-antichymotrypsin                                                       | 0.5642 | 0.7364 |
| CD27 antigen                                                                   | 0.5660 | 0.7364 |
| Macrophage colony-stimulating factor 1 receptor                                | 0.5735 | 0.7364 |
| Phosphatidylinositol 4,5-bisphosphate 3-kinase catalytic subunit gamma isoform | 0.5791 | 0.7364 |
| Calcium/calmodulin-dependent protein kinase type 1D                            | 0.5830 | 0.7364 |
| Connective tissue-activating peptide III                                       | 0.5850 | 0.7364 |
| Natural cytotoxicity triggering receptor 3                                     | 0.5961 | 0.7396 |
| Tumor necrosis factor receptor superfamily member 3                            | 0.5980 | 0.7396 |
| C-C motif chemokine 23                                                         | 0.6254 | 0.7618 |
| Complement C5b-C6 complex                                                      | 0.6267 | 0.7618 |
| Platelet factor 4                                                              | 0.6351 | 0.7653 |
| CD97 antigen                                                                   | 0.6429 | 0.7683 |
| E-Selectin                                                                     | 0.6499 | 0.7701 |
| Mast/stem cell growth factor receptor Kit                                      | 0.6754 | 0.7879 |
| Complement C4b                                                                 | 0.6762 | 0.7879 |

|                                                      |        |        |
|------------------------------------------------------|--------|--------|
| Macrophage migration inhibitory factor               | 0.6930 | 0.8009 |
| Annexin A1                                           | 0.7091 | 0.8129 |
| Interleukin-1 alpha                                  | 0.7208 | 0.8196 |
| Complement C4                                        | 0.7453 | 0.8406 |
| C-C motif chemokine 16                               | 0.7713 | 0.8631 |
| Interleukin-1 Receptor accessory protein             | 0.7827 | 0.8690 |
| Interleukin-18 receptor accessory protein            | 0.8035 | 0.8771 |
| Complement C5                                        | 0.8075 | 0.8771 |
| Tyrosine-protein kinase Lyn, isoform B               | 0.8087 | 0.8771 |
| Allograft inflammatory factor 1                      | 0.8225 | 0.8811 |
| Sphingosine kinase 1                                 | 0.8249 | 0.8811 |
| Extracellular matrix protein 1                       | 0.8390 | 0.8895 |
| Tumor necrosis factor receptor superfamily member 25 | 0.8612 | 0.9062 |
| Tumor necrosis factor ligand superfamily member 4    | 0.8930 | 0.9327 |
| Tumor necrosis factor receptor superfamily member 6B | 0.9051 | 0.9370 |
| Carbohydrate sulfotransferase 2                      | 0.9104 | 0.9370 |
| C-C motif chemokine 5                                | 0.9285 | 0.9466 |
| Tyrosine-protein kinase Lyn                          | 0.9331 | 0.9466 |
| Group IIE secretory phospholipase A2                 | 0.9576 | 0.9644 |
| Tumor necrosis factor-inducible gene 6 protein       | 0.9710 | 0.9710 |

Supplementary Table 2. Inflammatory protein panel for all proteins for the control subjects, p value and fdr values (<0.05 for fdr was considered significant)

| Target Full Name                                      | p       | fdr     |
|-------------------------------------------------------|---------|---------|
| Prostaglandin G/H synthase 2                          | 5.3E-05 | 7.5E-03 |
| High mobility group protein B1                        | 1.3E-02 | 7.9E-01 |
| Tumor necrosis factor receptor superfamily member 8   | 3.0E-02 | 7.9E-01 |
| Tumor necrosis factor receptor superfamily member 11B | 3.6E-02 | 7.9E-01 |
| Interferon alpha-2                                    | 4.2E-02 | 7.9E-01 |
| C-C motif chemokine 17                                | 4.9E-02 | 7.9E-01 |
| CD40 ligand                                           | 5.6E-02 | 7.9E-01 |
| Platelet factor 4                                     | 6.1E-02 | 7.9E-01 |
| Interleukin-37                                        | 6.1E-02 | 7.9E-01 |
| C-C motif chemokine 21                                | 8.1E-02 | 7.9E-01 |
| CD97 antigen                                          | 8.5E-02 | 7.9E-01 |
| C-C motif chemokine 15                                | 9.5E-02 | 7.9E-01 |
| Interleukin-34                                        | 1.0E-01 | 7.9E-01 |
| Interleukin-6                                         | 1.0E-01 | 7.9E-01 |
| Tumor necrosis factor receptor superfamily member 14  | 1.2E-01 | 7.9E-01 |
| Lymphotactin                                          | 1.2E-01 | 7.9E-01 |
| Ras-related C3 botulinum toxin substrate 1            | 1.2E-01 | 7.9E-01 |
| C-C motif chemokine 1                                 | 1.2E-01 | 7.9E-01 |
| Tumor necrosis factor receptor superfamily member 18  | 1.2E-01 | 7.9E-01 |
| Connective tissue-activating peptide III              | 1.3E-01 | 7.9E-01 |
| Sphingosine kinase 1                                  | 1.3E-01 | 7.9E-01 |
| Interleukin-5                                         | 1.3E-01 | 7.9E-01 |
| Azurocidin                                            | 1.3E-01 | 7.9E-01 |
| Complement C4b                                        | 1.4E-01 | 7.9E-01 |
| Interleukin-10                                        | 1.4E-01 | 7.9E-01 |
| C-C motif chemokine 3-like 1                          | 1.5E-01 | 7.9E-01 |
| C-C motif chemokine 5                                 | 1.6E-01 | 7.9E-01 |
| Ribosomal protein S6 kinase alpha-5                   | 1.6E-01 | 7.9E-01 |
| MAP kinase-activated protein kinase 2                 | 1.7E-01 | 7.9E-01 |
| C-C motif chemokine 20                                | 1.7E-01 | 7.9E-01 |
| Tyrosine-protein kinase Lyn, isoform B                | 1.9E-01 | 7.9E-01 |
| C-C motif chemokine 2                                 | 1.9E-01 | 7.9E-01 |
| Alpha-1-antichymotrypsin                              | 1.9E-01 | 7.9E-01 |
| Growth-regulated alpha protein                        | 2.0E-01 | 7.9E-01 |
| Neutrophil-activating peptide 2                       | 2.0E-01 | 7.9E-01 |
| Retinoic acid receptor responder protein 2            | 2.1E-01 | 7.9E-01 |
| Fractalkine                                           | 2.1E-01 | 7.9E-01 |

|                                                               |         |         |
|---------------------------------------------------------------|---------|---------|
| Thrombospondin-1                                              | 2.1E-01 | 7.9E-01 |
| C-X-C motif chemokine 10                                      | 2.2E-01 | 7.9E-01 |
| C-C motif chemokine 4-like                                    | 2.2E-01 | 7.9E-01 |
| Tyrosine-protein kinase Lyn                                   | 2.4E-01 | 8.1E-01 |
| C-C motif chemokine 19                                        | 2.5E-01 | 8.2E-01 |
| C-C motif chemokine 8                                         | 2.5E-01 | 8.2E-01 |
| Interleukin-17F                                               | 2.6E-01 | 8.2E-01 |
| Protein S100-A9                                               | 2.8E-01 | 8.2E-01 |
| Kininogen-1                                                   | 2.8E-01 | 8.2E-01 |
| Extracellular matrix protein 1                                | 2.8E-01 | 8.2E-01 |
| C3a anaphylatoxin                                             | 2.9E-01 | 8.2E-01 |
| Endothelial monocyte-activating polypeptide 2                 | 2.9E-01 | 8.2E-01 |
| Tumor necrosis factor receptor superfamily member 3           | 2.9E-01 | 8.2E-01 |
| C3a anaphylatoxin des Arginine                                | 3.0E-01 | 8.2E-01 |
| Complement C4                                                 | 3.0E-01 | 8.2E-01 |
| Toll-like receptor 4:Lymphocyte antigen 96 complex            | 3.1E-01 | 8.2E-01 |
| Complement C5b-C6 complex                                     | 3.3E-01 | 8.6E-01 |
| Macrophage colony-stimulating factor 1 receptor               | 3.4E-01 | 8.6E-01 |
| Tumor necrosis factor receptor superfamily member 21          | 3.4E-01 | 8.6E-01 |
| Protein kinase C theta type                                   | 3.6E-01 | 8.7E-01 |
| C-C motif chemokine 24                                        | 3.6E-01 | 8.7E-01 |
| Tumor necrosis factor receptor superfamily member 11A         | 3.6E-01 | 8.7E-01 |
| Tyrosine-protein kinase HCK                                   | 3.8E-01 | 8.8E-01 |
| Sialoadhesin                                                  | 3.8E-01 | 8.8E-01 |
| Eotaxin                                                       | 3.9E-01 | 8.8E-01 |
| C-X-C motif chemokine 6                                       | 3.9E-01 | 8.8E-01 |
| CD27 antigen                                                  | 4.1E-01 | 9.0E-01 |
| Tumor necrosis factor receptor superfamily member 1A          | 4.2E-01 | 9.0E-01 |
| C-reactive protein                                            | 4.2E-01 | 9.0E-01 |
| Serine/threonine-protein kinase TBK1                          | 4.4E-01 | 9.3E-01 |
| EGF-like module-containing mucin-like hormone receptor-like 2 | 4.6E-01 | 9.3E-01 |
| Tumor necrosis factor receptor superfamily member 19L         | 4.6E-01 | 9.3E-01 |
| C-C motif chemokine 23                                        | 4.7E-01 | 9.3E-01 |
| Interleukin-1 alpha                                           | 4.7E-01 | 9.3E-01 |
| Complement C3b                                                | 4.8E-01 | 9.3E-01 |
| Complement C3d fragment                                       | 4.9E-01 | 9.3E-01 |
| Lymphocyte antigen 86                                         | 5.1E-01 | 9.3E-01 |
| Lysozyme C                                                    | 5.1E-01 | 9.3E-01 |
| C-type lectin domain family 7 member A                        | 5.1E-01 | 9.3E-01 |
| Interleukin-23                                                | 5.2E-01 | 9.3E-01 |
| Tumor necrosis factor ligand superfamily member 4             | 5.3E-01 | 9.3E-01 |

|                                                                                |         |         |
|--------------------------------------------------------------------------------|---------|---------|
| Phosphatidylinositol 4,5-bisphosphate 3-kinase catalytic subunit gamma isoform | 5.3E-01 | 9.3E-01 |
| C-C motif chemokine 18                                                         | 5.3E-01 | 9.3E-01 |
| Insulin-like growth factor-binding protein 4                                   | 5.7E-01 | 9.6E-01 |
| Protein kinase C zeta type                                                     | 5.8E-01 | 9.6E-01 |
| Interleukin-1 beta                                                             | 5.8E-01 | 9.6E-01 |
| Complement C3b, inactivated                                                    | 5.8E-01 | 9.6E-01 |
| C-C motif chemokine 25                                                         | 5.8E-01 | 9.6E-01 |
| Bone morphogenetic protein 6                                                   | 5.9E-01 | 9.6E-01 |
| Tumor necrosis factor                                                          | 6.0E-01 | 9.6E-01 |
| Interleukin-10 receptor subunit beta                                           | 6.2E-01 | 9.6E-01 |
| Mast/stem cell growth factor receptor Kit                                      | 6.3E-01 | 9.6E-01 |
| Tumor necrosis factor receptor superfamily member 1B                           | 6.4E-01 | 9.6E-01 |
| Interleukin-1 Receptor accessory protein                                       | 6.4E-01 | 9.6E-01 |
| C-X-C motif chemokine 5                                                        | 6.4E-01 | 9.6E-01 |
| Group IIE secretory phospholipase A2                                           | 6.4E-01 | 9.6E-01 |
| C-C motif chemokine 7                                                          | 6.5E-01 | 9.6E-01 |
| Interleukin-17D                                                                | 6.7E-01 | 9.6E-01 |
| C-X-C motif chemokine 11                                                       | 6.9E-01 | 9.6E-01 |
| Tumor necrosis factor receptor superfamily member 4                            | 6.9E-01 | 9.6E-01 |
| Interleukin-18 receptor accessory protein                                      | 6.9E-01 | 9.6E-01 |
| Advanced glycosylation end product-specific receptor, soluble                  | 6.9E-01 | 9.6E-01 |
| Protein DJ-1                                                                   | 7.1E-01 | 9.6E-01 |
| Transforming growth factor beta-1                                              | 7.2E-01 | 9.6E-01 |
| C-C motif chemokine 14                                                         | 7.2E-01 | 9.6E-01 |
| Interleukin-2 receptor subunit alpha                                           | 7.3E-01 | 9.6E-01 |
| Carbohydrate sulfotransferase 2                                                | 7.4E-01 | 9.6E-01 |
| CD5 antigen-like                                                               | 7.5E-01 | 9.6E-01 |
| Ck-beta-8-1                                                                    | 7.6E-01 | 9.6E-01 |
| Tumor necrosis factor receptor superfamily member 10A                          | 7.7E-01 | 9.6E-01 |
| Calcium/calmodulin-dependent protein kinase type 1D                            | 7.8E-01 | 9.6E-01 |
| Interleukin-22                                                                 | 7.8E-01 | 9.6E-01 |
| Interleukin-13                                                                 | 7.8E-01 | 9.6E-01 |
| Interleukin-23 receptor                                                        | 7.9E-01 | 9.6E-01 |
| Macrophage migration inhibitory factor                                         | 7.9E-01 | 9.6E-01 |
| Macrophage colony-stimulating factor 1                                         | 7.9E-01 | 9.6E-01 |
| C-X-C motif chemokine 13                                                       | 7.9E-01 | 9.6E-01 |
| Interleukin-17A                                                                | 8.1E-01 | 9.6E-01 |
| Toll-like receptor 2                                                           | 8.1E-01 | 9.6E-01 |
| Allograft inflammatory factor 1                                                | 8.2E-01 | 9.6E-01 |
| Oxidized low-density lipoprotein receptor 1                                    | 8.4E-01 | 9.6E-01 |
| Tumor necrosis factor receptor superfamily member 9                            | 8.6E-01 | 9.6E-01 |



|                                                                                                                                               |         |         |
|-----------------------------------------------------------------------------------------------------------------------------------------------|---------|---------|
| Phosphatidylinositol 4,5-bisphosphate 3-kinase catalytic subunit alpha isoform:Phosphatidylinositol 3-kinase regulatory subunit alpha complex | 8.6E-01 | 9.6E-01 |
| E-Selectin                                                                                                                                    | 8.6E-01 | 9.6E-01 |
| Tumor necrosis factor receptor superfamily member 25                                                                                          | 8.7E-01 | 9.6E-01 |
| Interleukin-1 receptor-like 2                                                                                                                 | 8.7E-01 | 9.6E-01 |
| C5a anaphylatoxin                                                                                                                             | 8.7E-01 | 9.6E-01 |
| C-C motif chemokine 22                                                                                                                        | 8.8E-01 | 9.6E-01 |
| Peroxiredoxin-5, mitochondrial                                                                                                                | 8.8E-01 | 9.6E-01 |
| Natural cytotoxicity triggering receptor 3                                                                                                    | 8.8E-01 | 9.6E-01 |
| Complement C3                                                                                                                                 | 9.0E-01 | 9.6E-01 |
| Annexin A1                                                                                                                                    | 9.0E-01 | 9.6E-01 |
| C-C motif chemokine 3                                                                                                                         | 9.0E-01 | 9.6E-01 |
| Complement C5                                                                                                                                 | 9.1E-01 | 9.6E-01 |
| PSA:alpha-1-antichymotrypsin complex                                                                                                          | 9.1E-01 | 9.6E-01 |
| Tumor necrosis factor-inducible gene 6 protein                                                                                                | 9.1E-01 | 9.6E-01 |
| C-C motif chemokine 13                                                                                                                        | 9.2E-01 | 9.6E-01 |
| Interleukin-27                                                                                                                                | 9.3E-01 | 9.6E-01 |
| Hepatitis A virus cellular receptor 2                                                                                                         | 9.4E-01 | 9.6E-01 |
| Interleukin-8                                                                                                                                 | 9.4E-01 | 9.6E-01 |
| C-C motif chemokine 16                                                                                                                        | 9.5E-01 | 9.6E-01 |
| Tumor necrosis factor receptor superfamily member 6B                                                                                          | 9.5E-01 | 9.6E-01 |
| Interleukin-17B                                                                                                                               | 9.5E-01 | 9.6E-01 |
| P-Selectin                                                                                                                                    | 9.7E-01 | 9.7E-01 |
